# Supplementary material for: Obstructive spirometry pattern and the risk of chronic kidney disease: analysis from the community-based prospective Ansan-Ansung cohort in Korea
Source: PubMed Central journal article supplement — BMJ Open. 2021 Feb 28;11(3):e043432. doi: 10.1136/bmjopen-2020-043432 (PMC8098974; doi:10.1136/bmjopen-2020-043432), 2021-02-28
Supplement: bmjopen-2020-043432supp002.pdf [file bmjopen-2020-043432supp002.pdf]

**Table S1. Sensitivity analysis for the relationship between the %-predicted FEV1, FVC and the risk of incident CKD**

|                                  | Univariate                   | Model 1                      | Model 2                      |
|----------------------------------|------------------------------|------------------------------|------------------------------|
|                                  | HR (95% CI, <i>P</i> -value) | HR (95% CI, <i>P</i> -value) | HR (95% CI, <i>P</i> -value) |
| <i>%</i> -predicted FEV1         |                              |                              |                              |
| 1Q: < 88 %-predicted (n=1,985)   | 1.58 (1.23-2.03, < 0.001)    | 1.64 (1.25-2.08, < 0.001)    | 1.28 (0.99-1.65, 0.061)      |
| 2Q: 88-96 %-predicted (n=2,067)  | 1.26 (0.98-1.63, 0.074)      | 1.27 (0.98-1.65, 0.067)      | 1.16 (0.89-1.50, 0.277)      |
| 3Q: 97-105 %-predicted (n=2,002) | 1.14 (0.88-1.48, 0.308)      | 1.15 (0.89-1.49, 0.296)      | 1.09 (0.84-1.41, 0.533)      |
| 4Q: 106 %-predicted (n=1,906)    | 1.00 (Reference)             | 1.00 (Reference)             | 1.00 (Reference)             |
| <i>%</i> -predicted FVC          |                              |                              |                              |
| 1Q: < 89 %-predicted (n=2,045)   | 2.19 (1.69-2.84, < 0.001)    | 2.16 (1.66-2.81, < 0.001)    | 1.68 (1.29-2.19, < 0.001)    |
| 2Q: 89-96 %-predicted (n=1,949)  | 1.71 (1.30-2.25, < 0.001)    | 1.70 (1.29-2.23, < 0.001)    | 1.52 (1.15-2.00, 0.003)      |
| 3Q: 97-104 %-predicted (n=1,911) | 1.48 (1.12-1.95, 0.006)      | 1.48 (1.12-1.95, 0.006)      | 1.34 (1.01-1.77, 0.042)      |
| 4Q: 105 %-predicted (n=2,055)    | 1.00 (Reference)             | 1.00 (Reference)             | 1.00 (Reference)             |

Model 1: adjustment for sex and BMI. Model 2: model 1 + adjustment for college graduate, high income, smoking status, systolic and diastolic BP, waist circumference, fasting glucose, triglyceride, HDL-cholesterol, creatinine, hemoglobin level, WBC count, and CRP. Abbreviations: FEV1, forced expiratory volume in 1 second; FVC, forced vital capacity; CKD, chronic kidney disease; HR, hazard ratio; CI, confidence interval; BMI, body mass index; HDL, high density lipoprotein; CRP, C-reactive protein; BP, blood pressure; WBC, white blood cell.

**Table S2. Additional subgroup analysis for the relationship between the FEV1/FVC ratio and the risk of CKD.**

| Subgroup        | No. of people    | Per 0.1 increase of FEV1/FVC ratio |                          |
|-----------------|------------------|------------------------------------|--------------------------|
|                 |                  | Adjusted HR (95%CI, <i>P</i> )     | <i>P</i> for interaction |
| Age             | < 50 (n=3,940)   | 0.81 (0.56-1.17, 0.267)            | -                        |
|                 | ≥ 50 (n=4,020)   | 0.85 (0.75-0.96, 0.007)            |                          |
| Sex             | Male (n=3,835)   | 0.74 (0.63-0.86, < 0.001)          | 0.632                    |
|                 | Female (n=4,125) | 0.74 (0.63-0.86, < 0.001)          |                          |
| BMI             | < 25 (n=4,539)   | 0.68 (0.59-0.77, < 0.001)          | 0.054                    |
|                 | ≥ 25 (n=3,421)   | 0.79 (0.65-0.95, 0.012)            |                          |
| Central obesity | No (n=4,866)     | 0.72 (0.62-0.83, < 0.001)          | 0.657                    |
|                 | Yes (n=3,094)    | 0.76 (0.64-0.89, 0.001)            |                          |
| Raised TG       | No (n=4,627)     | 0.74 (0.64-0.86, < 0.001)          | 0.513                    |
|                 | Yes (n=3,333)    | 0.73 (0.63-0.86, < 0.000)          |                          |
| Reduced HDL-C   | No (n=3,695)     | 0.67 (0.58-0.78, < 0.001)          | 0.437                    |
|                 | Yes (n=4,265)    | 0.79 (0.68-0.92, 0.003)            |                          |
| Raised BP       | No (n=4,560)     | 0.63 (0.53-0.74, < 0.000)          | 0.028                    |
|                 | Yes (n=3,400)    | 0.80 (0.70-0.92, 0.002)            |                          |
| Raised FG       | No (n=7,025)     | 0.71 (0.63-0.79, < 0.000)          | 0.060                    |
|                 | Yes (n=935)      | 0.93 (0.70-1.24, 0.616)            |                          |

Adjusted beta and 95% CI were analyzed using multivariate Cox proportional hazards regression analysis. All covariates of model 2 shown in table 2 were used to adjustment. Variable used to divide subgroups was excluded from the adjustment. Abbreviations: FEV1, forced expiratory volume in 1 second; FVC, functional vital capacity; CKD, chronic kidney disease; BMI, body mass index; TG, triglyceride; HDL-C, high density lipoprotein cholesterol; BP, blood pressure; FG, fasting glucose; HR, hazard ratio; CI, confidence interval.
