# Supplementary figures and images for: Obstructive spirometry pattern and the risk of chronic kidney disease: analysis from the community-based prospective Ansan-Ansung cohort in Korea
Source: PubMed Central journal article supplement — BMJ Open. 2021 Feb 28;11(3):e043432. doi: 10.1136/bmjopen-2020-043432 (PMC8098974; doi:10.1136/bmjopen-2020-043432), 2021-02-28

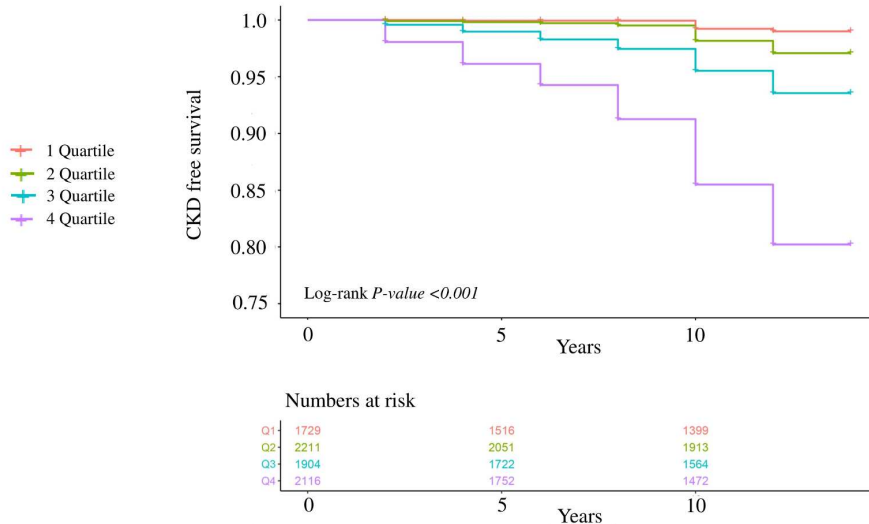

Supplement: bmjopen-2020-043432supp001.pdf [file bmjopen-2020-043432supp001.pdf]
